# Supplementary material
Source: Research Square preprint supplement (doi:10.21203/rs.3.rs-9062167/v1)
Supplement: Supplementary file 1 [file 3d71da391f55d067fb699771.pdf]

### Evaluation of factors influencing career choice

\*Instructions: Please rate the importance of each of the following factors when making your career choice on a five-point scale (1 = not at all important, 2 = slightly important, 3 = moderately important, 4 = very important, 5 = extremely important).\*

---

|                            | Not at all | Slightly  | Moderately | Very      | Extremely |
|----------------------------|------------|-----------|------------|-----------|-----------|
| Factor                     | important  | important | important  | important | important |
| Availability of permanent  |            |           |            |           |           |
| staffing                   |            |           |            |           |           |
| Work location              |            |           |            |           |           |
| Institutional nature       |            |           |            |           |           |
| Position type              |            |           |            |           |           |
| Salary and benefits        |            |           |            |           |           |
| Professional relevance     |            |           |            |           |           |
| Marital status and partner |            |           |            |           |           |
| Personal development       |            |           |            |           |           |
| Family expectations        |            |           |            |           |           |
| Institutional factors      |            |           |            |           |           |
| Mentor factors             |            |           |            |           |           |

---
